# Supplementary material for: Immunomarker Support Vector Machine Classifier for Prediction of Gastric Cancer Survival and Adjuvant Chemotherapeutic Benefit
Source: Oxford University Press journal article supplement (doi:10.1158/1078-0432.ccr-18-0848), 2018-07-24
Supplement: 10780432ccr180848-sup-198590_2_supp_4887574_pbq5qq.docx [file 10780432ccr180848-sup-198590_2_supp_4887574_pbq5qq.docx]

Table S2. Antibody sources and staining conditions.

| Markers | Main target | Antibody source | Species | Dilution | DAB dyeing time | Antigen Retrieval | Cellular  localization |
| --- | --- | --- | --- | --- | --- | --- | --- |
| CD3 | T cell | NeoMarker, clone SP7 | Rabbit monoclonal | 1:300 | 1.0 min | Citrate buffer (pH 6.0) microwave 20min | Membranous |
| CD8 | T cell | NeoMarker, clone SP16 | Rabbit monoclonal | 1:200 | 1.5 min | Citrate buffer (pH 6.0) microwave 20min | Membranous |
| CD45RO | Memory T cell | Invitrogen, clone UCHL1 | Mouse monoclonal | 1:400 | 1.0 min | Citrate buffer (pH 6.0) microwave 20min | Membranous |
| CD45RA | Primary T cell | Zhong-shan Goldenbridge | Mouse monoclonal | 1:200 | 30 secs | Citrate buffer (pH 6.0) microwave 20min | Membranous |
| CD57 | Natural Killer cell | NeoMarker, clone NK1 | Mouse monoclonal | 1:100 | 2.0 min | Citrate buffer (pH 6.0) microwave 20min | Membranous |
| CD66b | Neutrophil | BD Pharmingen | Mouse monoclonal | 1:200 | 1.0 min | Citrate buffer (pH 6.0) microwave 20min | Membranous |
| CD68 | Macrophage | Dako, clone PG-M1 | Mouse monoclonal | 1:400 | 30 secs | Citrate buffer (pH 6.0) microwave 20min | Cytoplasmic |
| CD34 | Microvessel | Abcam, ab81289 | Rabbit monoclonal | 1:200 | 1.0 min | Citrate buffer (pH 6.0) microwave 20min | Membranous |

min: minute; sec: second. DAB: diaminobenzidine.
