# Supplementary material for: Immunomarker Support Vector Machine Classifier for Prediction of Gastric Cancer Survival and Adjuvant Chemotherapeutic Benefit
Source: Oxford University Press journal article supplement (doi:10.1158/1078-0432.ccr-18-0848), 2018-07-24
Supplement: 10780432ccr180848-sup-198590_2_supp_4887576_pbq5qq.docx [file 10780432ccr180848-sup-198590_2_supp_4887576_pbq5qq.docx]

| Table S4. Univariable analysis of the GC-SVM classifier, patient characteristics, immunomarker expression, and overall survival in the internal and external cohorts. | | | | |
| --- | --- | --- | --- | --- |
| **Variable** | **Internal validation cohort**  **(N=248)** | | **External validation cohort**  **(N=287)** | |
| HR (95%CI) | *P* | HR (95%CI) | *P* |
| Age(years) (≥60 vs. <60) | 1.484 (1.062-2.074) | 0.021 | 1.163 (0.856-1.581) | 0.333 |
| Gender (female vs. male) | 1.040 (0.741-1.460) | 0.822 | 1.095 (0.796-1.505) | 0.578 |
| ECOG PS | 0.978 (0.692-1.384) | 0.902 | 1.030 (0.762-1.391) | 0.848 |
| ASA score | 1.010 (0.739-1.380) | 0.948 | 1.222 (0.921-1.620) | 0.164 |
| Charlson comorbidity index | 1.001 (0.788-1.273) | 0.991 | 1.043 (0.843-1.291) | 0.698 |
| Tumor size (>4 cm vs. ≤4 cm) | 1.654 (1.157-2.364) | 0.006 | 1.885 (1.377-2.580) | <0.0001 |
| Tumor location(higher vs. lower) | 1.027 (0.870-1.212) | 0.752 | 1.001 (0.837-1.197) | 0.993 |
| Differentiation status(low vs. well+moderate) | 1.885 (1.305-2.721) | 0.001 | 1.411 (0.987-2.016) | 0.059 |
| Lauren type | 0.913 (0.640-1.302) | 0.614 | 0.941 (0.683-1.26) | 0.710 |
| CEA(ng*/*ml) (elevated vs. normal) | 1.897 (1.301-2.765) | 0.001 | 1.586 (1.077-2.336) | 0.020 |
| CA199(U*/*ml) (elevated vs. normal) | 1.994 (1.400-2.839) | <0.0001 | 1.991 (1.438-2.756) | <0.0001 |
| Depth of invasion(T3+4 vs. T1+2) | 1.594 (1.308-1.943) | <0.0001 | 1.408 (1.237-1.602) | <0.0001 |
| Lymph node metastasis(N1+2+3 vs. N0) | 2.446 (1.586-3.774) | <0.0001 | 2.521 (1.744-3.646) | <0.0001 |
| Stage(III+IV vs. I+II) | 1.524 (1.313-1.707) | <0.0001 | 1.513 (1.333-1.718) | <0.0001 |
| CD66b IM(high vs. low) | 2.175 (1.523-3.108) | <0.0001 | 1.830 (1.337-2.506) | <0.0001 |
| CD68 CT(high vs. low) | 2.692 (1.875-3.865) | <0.0001 | 1.871 (1.360-2.575) | <0.0001 |
| CD3 IM(high vs. low) | 0.456 (0.322-0.646) | <0.0001 | 0.617 (0.450-0.846) | 0.003 |
| CD3 CT(high vs. low) | 0.482 (0.344-0.676) | <0.0001 | 0.599 (0.437-0.820) | 0.001 |
| CD57 IM(high vs. low) | 0.409 (0.277-0.603) | <0.0001 | 0.562 (0.386-0.817) | 0.003 |
| CD34(high vs. low) | 2.104 (1.506-2.938) | <0.0001 | 1.735 (1.253-2.401) | 0.001 |
| CD45RO CT(high vs. low) | 0.388 (0.277-0.543) | <0.0001 | 0.583 (0.429-0.793) | 0.001 |
| CD8 IM(high vs. low) | 0.424 (0.300-0.600) | <0.0001 | 0.632 (0.463-0.861) | 0.004 |
| **GC-SVM (high vs. low)** | **0.166 (0.110-0.250)** | **<0.0001** | **0.125 (0.083-0.190)** | **<0.0001** |
