# Supplementary material for: Immunomarker Support Vector Machine Classifier for Prediction of Gastric Cancer Survival and Adjuvant Chemotherapeutic Benefit
Source: Oxford University Press journal article supplement (doi:10.1158/1078-0432.ccr-18-0848), 2018-07-24
Supplement: 10780432ccr180848-sup-198590_2_supp_4887578_pbq5qq.docx [file 10780432ccr180848-sup-198590_2_supp_4887578_pbq5qq.docx]

| Table S6. ROC curves for GC-SVM, clinical stage, clinicopathological characteristics as predictors of death within 5 years in training and validation cohorts. | | | | | |
| --- | --- | --- | --- | --- | --- |
| **Variable** | **Training cohort** |  | **Internal validation cohort** |  | **External validation cohort** |
| AUC (95% CI) |  | AUC (95% CI) |  | AUC (95% CI) |
| **GC-SVM** | **0.796(0.732-0.859)** |  | **0.809(0.752-0.866)** |  | **0.834(0.783-0.884)** |
| Stage | 0.649(0.578-0.720) |  | 0.746(0.685-0.807) |  | 0.745(0.687-0.802) |
| CD66b IM | 0.657(0.586-0.729) |  | 0.650(0.581-0.719) |  | 0.670(0.606-0.734) |
| CD45RO CT | 0.654(0.584-0.723) |  | 0.661(0.592-0.729) |  | 0.608(0.542-0.674) |
| CD68 CT | 0.585(0.514-0.657) |  | 0.679(0.611-0.746) |  | 0.604(0.539-0.669) |
| CD3 IM | 0.657(0.585-0.728) |  | 0.652(0.583-0.721) |  | 0.577(0.510-0.644) |
| CD8 IM | 0.636(0.564-0.708) |  | 0.641(0.572-0.710) |  | 0.605(0.539-0.671) |
| CD34 | 0.624(0.552-0.695) |  | 0.624(0.554-0.694) |  | 0.620(0.554-0.686) |
| CD3 CT | 0.635(0.563-0.707) |  | 0.631(0.561-0.700) |  | 0.609(0.543-0.675) |
| CD57 IM | 0.628(0.555-0.702) |  | 0.643(0.574-0.712) |  | 0.579(0.511-0.646) |
| CEA | 0.548(0.474-0.621) |  | 0.579(0.508-0.650) |  | 0.538(0.471-0.605) |
| CA199 | 0.572(0.499-0.644) |  | 0.593(0.522-0.663) |  | 0.611(0.546-0.676) |
| Depth of invasion (T) | 0.579(0.503-0.654) |  | 0.643(0.573-0.712) |  | 0.686(0.624-0.749) |
| Lymph node  metastasis (N) | 0.630(0.558-0.701) |  | 0.643(0.575-0.712) |  | 0.716(0.656-0.775) |
| Differentiation status | 0.560(0.486-0.634) |  | 0.575(0.504-0.646) |  | 0.546(0.478-0.614) |
| Size | 0.546(0.472-0.621) |  | 0.583(0.512-0.655) |  | 0.618(0.553-0.684) |
| Lauren | 0.505(0.431-0.580) |  | 0.489(0.416-0.561) |  | 0.498(0.430-0.565) |
| Sex | 0.475(0.400-0.551) |  | 0.493(0.421-0.565) |  | 0.496(0.429-0.564) |
| Age | 0.505(0.430-0.580) |  | 0.562(0.491-0.634) |  | 0.523(0.455-0.590) |
| CD66b CT | 0.582(0.510-0.654) |  | 0.594(0.524-0.665) |  | 0.579(0.513-0.645) |
| CD68 IM | 0.593(0.518-0.668) |  | 0.606(0.535-0.677) |  | 0.587(0.520-0.654) |
| CD8 CT | 0.587(0.515-0.660) |  | 0.597(0.526-0.668) |  | 0.593(0.528-0.659) |
| CD57 CT | 0.608(0.535-0.681) |  | 0.609(0.538-0.679) |  | 0.601(0.534-0.667) |
| CD45RO IM | 0.620(0.547-0.694) |  | 0.596(0.525-0.667) |  | 0.612(0.545-0.678) |
| CD45RA IM | 0.618(0.544-0.692) |  | 0.610(0.538-0.681) |  | 0.609(0.542-0.675) |
| CD45RA CT | 0.586(0.513-0.658) |  | 0.586(0.515-0.657) |  | 0.583(0.517-0.650) |
