# Supplementary figures and images for: Immunomarker Support Vector Machine Classifier for Prediction of Gastric Cancer Survival and Adjuvant Chemotherapeutic Benefit
Source: Oxford University Press journal article supplement (doi:10.1158/1078-0432.ccr-18-0848), 2018-07-24

**Figure S1**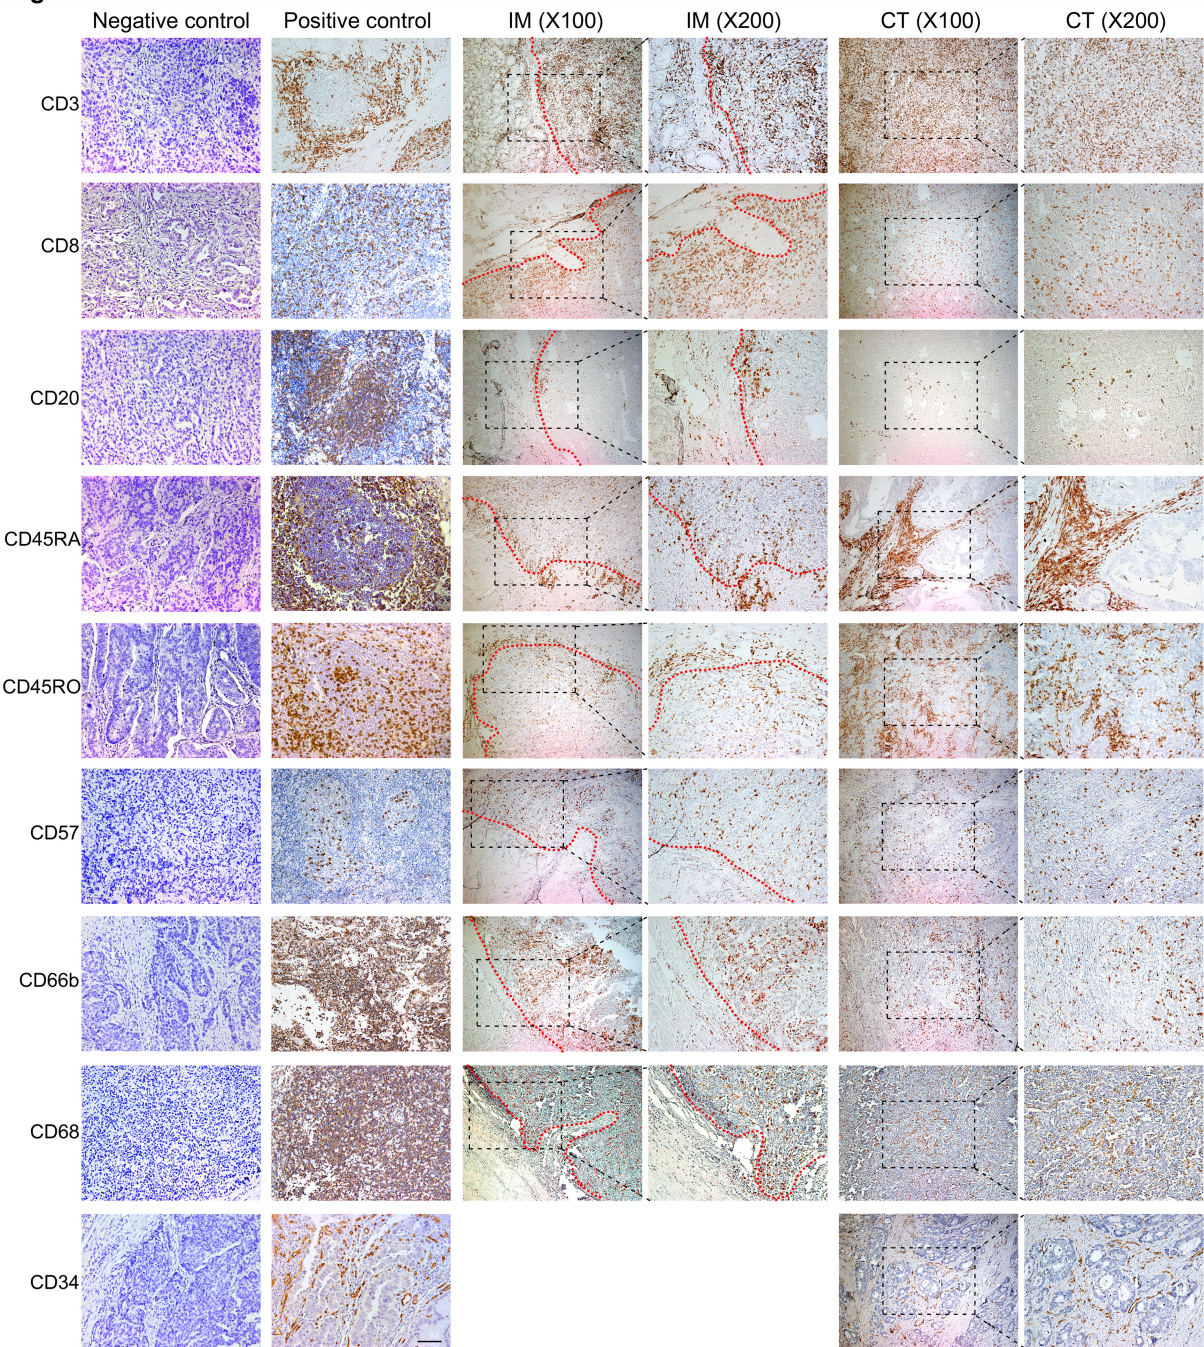

Supplement: 10780432ccr180848-sup-198590_2_supp_4887539_pbq5qp.pdf [file 10780432ccr180848-sup-198590_2_supp_4887539_pbq5qp.pdf]
